1 **Differential characterization of physiological and biochemical responses during**  
2 **drought stress in finger millet varieties**

3

4 Asunta Mukami<sup>1\*</sup>, Alex Ngetich<sup>2</sup>, Cecilia Mweu<sup>2</sup>, Richard O. Oduor<sup>3</sup>, Mutemi  
5 Muthangya<sup>1</sup>, Wilton Mwema Mbinda<sup>4\*</sup>

6

7 <sup>1</sup>Department of Life Sciences, South Eastern Kenya University, Kitui, Kenya.

8 <sup>2</sup>Institute of Biotechnology Research, Jomo Kenyatta University of Agriculture  
9 Technology, Nairobi, Kenya.

10 <sup>3</sup>Department of Biochemistry and Biotechnology, Kenyatta University, Nairobi,  
11 Kenya

12 <sup>4</sup>Department of Department of Biochemistry and Biotechnology, Pwani University  
13 Kilifi, Kenya.

14

15 \*Corresponding authors: Asunta Mukami, Position, M.Sc. Student, Tel  
16 +254713551848, E-mail addresses: [amukami@seku.ac.ke](mailto:amukami@seku.ac.ke); Wilton Mbinda, Position,  
17 Lecturer, Tel +254722723950 E-mail addresses: [wilton.mbinda@gmail.com](mailto:wilton.mbinda@gmail.com)

18

19

20

21

22 **Abstract**

23 Drought is the most perilous abiotic stress that affects finger millet growth and  
24 productivity worldwide. For the successful production of finger millet, selection of  
25 drought tolerant varieties is necessary and critical stages under drought stress,  
26 germination and early seedling growth, ought to be fully understood. This study  
27 investigated the physiological and biochemical responses of six finger millet varieties  
28 (GBK043137, GBK043128, GBK043124, GBK043122, GBK043094 and  
29 GBK043050) under mannitol-induced drought stress. Seeds were germinated on  
30 sterile soil and irrigated with various concentrations of mannitol (200, 400 and 600  
31 mM) for two weeks. Comparative analysis in terms of relative water content (RWC),  
32 chlorophyll, proline, and malondialdehyde (MDA) contents were measured the  
33 physiological and biochemical characteristics of drought stress. The results showed  
34 that increased level of drought stress seriously decreased germination and early  
35 seedling growth of finger millet varieties. However, root growth was increased. In  
36 addition, exposition to drought stress triggered a significant decrease in relative water  
37 content and chlorophyll content reduction the biochemical parameters assay showed  
38 less reduction of relative water content. Furthermore, oxidative damage indicating  
39 parameters such as proline concentration and MDA content increased. Varieties  
40 GBK043137 and GBK043094 were less affected by drought as shown by significant  
41 change in the physiological parameters. Our findings reveal the difference and linkage  
42 between the physiological responses of finger millet to drought and are vital for  
43 breeding and selection of drought tolerant varieties of finger millet. Further  
44 investigations on genomic and molecular to deeply insight the detail mechanisms of  
45 drought tolerance in finger millet need to explored.

46

47 **Key words:** Drought stress, finger millet, germination, lipid peroxidation, mannitol,  
48 oxidative stress

49

50

51 **Introduction**

52 Drought stress, which mostly characterize arid and semi-arid regions of the world, is  
53 one of the most severe environmental stress which is responsible for poor agricultural  
54 productivity and yield decline (Zougmore, 2018). The climate of most of sub-Saharan  
55 African is characterized by high temperature and low rainfall, during the vegetation  
56 seasons. (Rishmaw et al., 2016). Due to global climate change, it is predicted that  
57 drought episodes will increase in frequency, be longer and more severe, exacerbating  
58 its negative effects on crops and compromise food security particularly in developing  
59 countries. Over time, plants have evolved a range of drought tolerance adaptative  
60 mechanisms to counteract the detrimental effects of drought. When grown under  
61 desiccation stress, plants exhibit a sequence series of morphological, physiological,  
62 biochemical, cellular and molecular changes that severely compromise plant's  
63 growth, development and productivity (Li and Liu, 2016). Plants under water deficit  
64 conditions decrease net photosynthesis and transpiration rates. These two  
65 physiological responses, which vary depending on the species, are often seen in  
66 regions with very high evaporative demand (Anjum et al., 2011). Protection systems  
67 against excess reducing power are therefore a vital approach for plants under  
68 desiccation stress (Chaves et al., 2009). Drought stress in plants is physiologically  
69 complex and it encompasses osmotic stress and specific ion toxicity (Todaka et al.,  
70 2015). Drought stress in plants is associated with nutritional imbalance, adjustment in  
71 metabolic fluxes, distortion and disorganization of cell and chloroplast membranes as  
72 well as reduction in division and expansion of cells and overproduction of reactive  
73 oxygen species (ROS) (Forni et al., 2017). Toxicity accruing from overproduction of  
74 ROS triggers cascades of oxidative reactions which consequently causes inactivation  
75 of enzymes and increase of lipid peroxidation, whose final product is  
76 malondialdehyde (MDA) and its quantification is used as a marker for oxidative  
77 damage (Moller et al., 2007). To abate the effects of oxidative stress, plants have  
78 evolved complex enzymatic and non-enzymatic systems. When exposed to water  
79 deficit stress conditions, many plant species enhance the activities of antioxidant  
80 enzyme which are associated with increased proline concentration (Ashraf and  
81 Foolad, 2007). Proline plays significant role in the osmoregulation, allowing cells to  
82 retain more water. Moreover, the amino acid also displays plant defense properties as

83 a ROS scavenger (Szabados and Saviouré, 2010) and as a regulator of the cellular  
84 redox status (Sharma et al., 2011). Proline accumulation in plants is therefore  
85 considered as a positive indicator for their tolerance to water stress (Verslues et al.,  
86 2014). Plants capability to retain water during desiccation is a vital strategy for plant  
87 tolerance to stress caused by water deficit stress. Accordingly, evaluation of relative  
88 water content change is the best representation and a fast approach to evaluating  
89 genetic differences in cellular hydration, plant water deficit and physiological water  
90 status after water deficit stress treatments (Sánchez-Rodríguez et al. 2010). The best  
91 effective approach of mitigating drought is the development of the tolerant crop  
92 varieties. Accordingly, it is important to identify the genetic resources with high  
93 tolerance and to understand the physiological and biochemical response mechanisms  
94 of drought tolerance in important cereal crops such as finger millet.

95

96 Finger millet, [*Eleusine coracana* (L.) Gaertn.], is a cereal crop which is cultivated  
97 semi-arid and arid regions of world under rain fed conditions (Thilakarathna &  
98 Raizada, 2015). The crop plays a significant role in food security in arid and semi-arid  
99 regions of sub-Saharan Africa and South Asia. Finger millet is therefore an ideal crop  
100 for reshaping food propensity of people due to its nutritional richness, high  
101 photosynthetic efficiency, and better tolerance to biotic and abiotic stresses than other  
102 crops (Kumar et al., 2016). As a member of the *Panicoideae* subfamily, finger millet  
103 acts as a model cereal crop for investigating basic biological processes. Although  
104 most of the finger millet varieties are considered to be drought tolerant when  
105 compared with other cereal crops, such as sorghum, maize, rice, barley and wheat, the  
106 crop is drought sensitive especially at early stages, especially if the first rains of the  
107 season are distant from each other. Genetic variations in response to drought stress  
108 have been showed in many plant relatives and among accessions within the same  
109 species. To our knowledge, there is no literature available which reports  
110 morphological, physiological and biochemical responses of finger millet to water  
111 deficit stress. We therefore investigated the physiological and biochemical  
112 mechanisms involved in six finger millet varieties, from distinct geographical zones in  
113 Kenya, under mannitol induced drought stress. Physiological and biochemical  
114 parameters were measured such as germination rate, shoot growth and root growth,

115 relative water content (RWC), chlorophyll content, proline accumulation and lipid  
116 peroxidation.

117

## 118 **Materials and methods**

### 119 **Plant material, growth conditions and germination assay**

120 Finger millet varieties GBK043137, GBK043128, GBK043124, GBK043122,  
121 GBK043094 and GBK043050 obtained Kenya Agricultural and Livestock Research  
122 Organization, Gene Bank, Muguga, Kenya were used in this study. Seeds were sorted  
123 by handpicking of the healthy ones which were used for subsequent experiments.  
124 Selected seeds were washed with distilled water to remove dust and other particles.  
125 Germination assay was performed using 10 seeds of each variety. Seeds were planted  
126 in germination trays containing sterile soil to a depth of approximately 1 cm and  
127 irrigated with different concentrations of mannitol (200, 400 and 600 mM). The  
128 controls were irrigated with distilled water. Drought stress on was imposed on  
129 treatment groups by irrigating the seeds with various concentrations of mannitol at an  
130 interval of 3 days for two weeks. Observations on the rate of germination were scored  
131 on the 17<sup>th</sup> day of treatment.

132

### 133 **Growth conditions drought treatment**

134 Germinated finger millet seedlings were grown for 2 weeks under greenhouse  
135 conditions of  $25\pm 2$  °C and 60-70% humidity, with a 16/8-h photoperiod provided by  
136 natural sunlight. The seedlings were subjected to osmotic stress by irrigating with  
137 mannitol (200, 400 and 600 mM) for 21 days at an interval of 3 days. Control plants  
138 were watered with distilled water. Shoot length and root length were measured after  
139 the experiment.

140

### 141 **Determination of relative water content**

142 A leaf was excised from each plant on the 21<sup>st</sup> day of water deficit stress.  
143 Immediately, the fresh weight (FW) of each leaflet was determined. Thereafter, the  
144 leaflet was immersed in double distilled water and incubated under normal room  
145 temperature for 4 hours. Afterwards, the leaflet was taken out, thoroughly wiped to  
146 remove the water on the blade surface and its weight measured to obtain turgid weight

147 (TW). the leaflet was afterwards dried in an oven for 24 hours and its dry weight  
148 (DW) measured. The relative water content (RWC %) was calculated using the  
149 formula:  $RWC = [(FW - DW) / (TW - DW)] \times 100$ .

150

#### 151 **Total chlorophyll content**

152 Total chlorophyll (TC) content was determined using the method of described by  
153 Arnon (1949). Fresh leaves (0.2 g) of leaves plants were crushed in 80% acetone. The  
154 extract was centrifuged at 5000g for 3 minutes. The absorbance of the obtained  
155 supernatants was measured at 645 and 663 nm using 1240 UV-Vis Spectrophotometer  
156 (Shimadzu, Kyoto, Japan). The total chlorophyll content in each sample, expressed in  
157 mg/g fresh mass (FM) was calculated using the formula:  $TC = 20.2(A_{645}) +$   
158  $8.02(A_{663}) \times V/1000 \times W$  where V corresponds to the volume of total extract per litre,  
159 W is the mass of the fresh material and A is the absorbance as 645 and 663 nm.

160

#### 161 **Estimation of proline content**

162 The amount of free proline in fresh plant leaves was determined as reported by Bates  
163 et al. (1973). Fresh leaf tissues (50 mg) from each variety and treatment was  
164 homogenized in 10 ml of 3% w/v sulphosalicylic acid and the homogenate filtrated.  
165 The resulting solution was mixed with acidic ninhydrin solution [40% (w/v) acidic  
166 ninhydrin (8.8  $\mu$ M ninhydrin, 10.5 M glacial acetic acid, 2.4 M orthophosphoric acid),  
167 40% (v/v) glacial acetic acid and 20% (v/v) of 3%(v/v) sulphosalicylic acid].  
168 Thereafter, the reaction mixtures were put in a water bath at 100 °C for 60 minutes to  
169 develop colors. The reaction was terminated by incubating the mixtures in ice for 5  
170 minutes. Toluene was added to separate chromophores. The optical density was  
171 measured at 520 nm using 1240 UV-Vis Spectrophotometer. Free proline content  
172 [ $\mu$ mol/g fresh weight (F. WT)] in leaf tissues was calculated from a standard curve  
173 made using 0-100  $\mu$ g L-proline.

174

#### 175 **Lipid peroxidation assay**

176 Fresh upper second fully expended leaves (0.3 g) were harvested and homogenized in  
177 0.1 % (w/v) trichloroacetic acid and the homogenates were centrifuged at 10,000 g for  
178 15 minutes at 4 °C. The supernatant was mixed with 0.5 ml of 1.5 ml 0.5%

179 thiobarbituric acid diluted in 20% trichloroacetic acid and the resulting mixture was  
180 heated to 95 °C for 25 minutes in water bath before incubating it on ice for 10  
181 minutes. The absorbance was measured at 532 and 600 nm using UVmini-1240 UV-  
182 Vis Spectrophotometer with 1% thiobarbituric acid in 20% trichloroacetic acid as  
183 control. The amount of malondialdehyde ( $\mu\text{mol/g FW}$ ) calculated as a measure of  
184 lipid peroxidation, was determined according to Heath and Packer, (1968).

185

### 186 **Statistics data analysis**

187 The experiment was completely randomized block design with five replications of 10  
188 plants. For germination and physiological assays, 10 seeds per replication were  
189 employed. Data collected were subjected to one-way analysis of variance (ANOVA)  
190 followed by a Fisher's protected LSD test to compare the means. A confidence level  
191 was set at of 95% ( $p \leq 0.05$ ). All statistical procedures were performed using Minitab  
192 statistical computer software v.17.

193

### 194 **Results**

#### 195 **Effects of drought stress on seed germination**

196 The results demonstrated that the gemination rate of the tested finger millet varieties  
197 was significantly influenced by seed variety and mannitol concentration (Table 1).  
198 Under untreated conditions, results showed that the highest gemination rate was  
199 recorded after 5 days in variety GBK043137 (83.75%) followed by varieties  
200 GBK043124, GBK043128, GBK043122 and GBK043050 whose gemination rates  
201 ranged from 65.0% to 72.5%, while GBK043094 recorded the lowest one at 51.25%.  
202 Seeds geminated in absence of stress treatment recorded superior gemination  
203 percentages. Imposition of increasing concentration of mannitol resulted to a decrease  
204 in germination percentage. The decline was significantly pronounced at 400 mM  
205 mannitol where 0% germination rate for varieties GBK043137, GBK043122,  
206 GBK043094 and GBK043050 were recorded while varieties GBK043124 and  
207 GBK043128 recorded 16.25% and 1.25% germination rates respectively (Table 1).  
208 Under moderate drought stress of 200 mM mannitol, variety GBK043137 recorded  
209 the highest germination rate of 41.25% compared to the other varieties whose  
210 germination rates ranged from 3.75% to 16.25% (Table 1). In severe osmotic pressure

211 of 600 mM mannitol concentration, none of planted seeds were germinated. The  
212 average germination period under 0 mM mannitol concentration was 5.2 to 7.4 days  
213 for all varieties, while under 200 mM mannitol the germination interval was longer,  
214 ranging from 7.5 days to 13.6 days.

215

#### 216 **Effects of drought stress on growth**

217 The present study investigated the changes in the growth parameters (shoot and root  
218 growth) under mannitol induced drought conditions in all six finger millet varieties  
219 selected. The plant growth in the six varieties recorded remarkably higher responses  
220 in terms of shoot growth in absence of stress treatment compared to those exposed to  
221 mannitol induced drought stress (Fig. 1). The shoot length decreased progressively  
222 with increase in mannitol concentration (Table 2). Under mannitol stress conditions,  
223 higher growth responses were recorded at 200 mM mannitol, while the least responses  
224 were recorded at 600 mM mannitol (Table 2). Under stress conditions, variety  
225 GBK043128 recorded highest shoot length (3.00 cm) while the least response was  
226 observed in varieties GBK043137 and GBK043094 at 1.20 cm respectively (Table 2).  
227 Significance differences on the effect of mannitol on shoot length were only observed  
228 at 200 mM mannitol concentration. Higher mannitol concentrations did not record any  
229 significance differences among the varieties on shoot length (Table 2).

230

231 Contrary to shoot growth under mannitol osmotic stress conditions, the six finger  
232 millet varieties recorded an increase in root growth with increase in drought severity.  
233 The mannitol stressed plants recorded relatively higher responses when compared to  
234 control plants (Table 3). Variety GBK043094 recorded the highest root length under  
235 drought of 6.00 cm at 600 mM mannitol while GBK043050 and GBK043137 showed  
236 the least response with 2.30 cm and 2.60 cm respectively, at 200 mM mannitol  
237 treatment level (Table 3). The observed increase of root length across different  
238 drought stress levels was variety dependent.

239

#### 240 **Effects of drought stress on relative water content**

241 Table 4 presents the RWC changes in finger millet leaves along with increase in  
242 water-deficit stress. Under irrigated conditions, all varieties maintained the highest



243 RWC. Exposition of the plants to progressive mannitol concentrations simultaneously  
244 reduced RWC values of all varieties. The per cent reduction in RWC was the highest  
245 in GBK043122 which exhibited the lowest RWC value under water deficit stress at all  
246 the mannitol regimes. Variety GBK043128 sustained relatively high values of RWC  
247 and also showed lower percent reduction when compared to other varieties under  
248 water deficit stress. Plants under moderate water stress treatment of 200 mM mannitol  
249 displayed the highest diversity RWC values. The leaves exhibited wilting symptoms  
250 and leaf rolling at severe drought stress treatments.

251

### 252 **Effects of drought stress on total chlorophyll content**

253 Results from our study show an inverse relationship between mannitol induced  
254 drought stress responses and total chlorophyll content values for all finger millet  
255 varieties. Differences for chlorophyll content values were also observed among  
256 varieties. At the beginning of the experiment, total chlorophyll content across the  
257 varieties was similar ranging from 15.35 to 21.74 mg/g FW (Table 5). Imposition of  
258 moderate drought stress conditions of 200 mM mannitol caused a slight decrease of  
259 chlorophyll content ranging from 5.08% for GBK043094 to 14.2% for variety  
260 GBK043128. Significant decrease of ranging from 33.04 to 45.59% was observed at  
261 severe water stress conditions of 600 mM. Among the varieties exposed to severe  
262 water stress, varieties GBK043137 and GBK042094 retained relatively high  
263 chlorophyll content while drought-sensitive varieties GBK043050, GBK043128,  
264 GBK043122 and GBK043124 recorded a higher decline in chlorophyll reduction,  
265 ranging from 42.4% to 45.59% under mannitol induced drought stress (Table 5). The  
266 high drought-induced decrease of the total chlorophyll content signifies that drought  
267 stresses induced a high loss of photosynthetic reaction centers.

268

### 269 **Effect of mannitol on proline content**

270 The variations among the varieties in proline content under control conditions were  
271 significantly different and also did not follow any pattern (Table 6). In response to  
272 drought stress, all the varieties exhibited a steep increase in leaf proline content and  
273 the amount increased with the increased severity to the water stress. Variety  
274 GBK042094 had highest proline accumulation while GBK043128 had the least

275 proline concentration in all mannitol treatments. Varietal differences in drought stress  
276 induced proline were clearly observed in finger millet, signifying a correlation  
277 between proline accumulation and differential mannitol induced water deficit stress  
278 tolerance response among the six finger millet varieties studied.

279

### 280 **MDA content**

281 Lipid peroxidation was determined by measuring the accumulation of MDA, which is  
282 natural product of oxidation of polyunsaturated fatty acids present in the membrane  
283 caused by accumulation of peroxy radicals (Kotchoni, et al. 2006). Our results  
284 revealed that the MDA levels in finger millet leaves was significantly influenced by  
285 severity of mannitol induced osmotic stress and variety. At the beginning of the  
286 experiment, no significant difference was registered in MDA values for all finger  
287 millet varieties (Table 7). The MDA content was lower in control plants ranging from  
288 2.1 to 2.79  $\mu\text{mol/g}$  FW compared to plants subjected to mannitol induced drought  
289 stress which ranged from 2.77 to 7.23  $\mu\text{mol/g}$  FW. A progressive increase in the level  
290 of lipid peroxidation was observed with concomitant increase of mannitol  
291 concentration. The maximum MDA content under severe osmotic drought conditions  
292 (600 mM mannitol) was observed in GBK043128 followed by GBK043050 and  
293 GBK043122 varieties while varieties GBK042094 and GBK043137 had the least  
294 MDA accumulation at similar conditions (Table 7).

295

### 296 **Discussion**

297 Drought stress induces different physiological, genetic and metabolic responses  
298 among several species of plant and varieties. These responses are also influenced by  
299 edaphic, climatic and agronomic factors (Caliz et al., 2015). Vulnerability of plants to  
300 drought stress differentially varies in depending on stress severity, interactions among  
301 stressors, plant species and stages of their development (Demirevska et al., 2009).  
302 This natural allelic difference may provide valuable information into the mechanisms  
303 which underline the differential responses to agriculturally important traits and search  
304 of the crops that can survive such harsh environments may assist to ensure stable and  
305 sustainable food production (Budak et al., 2013). As a dry-land crop, finger millet  
306 growth and productivity is highly affected by drought stress which is projected to

307 increase in severity and frequency with current adverse climate change era. In order to  
308 overcome this, there is need to develop new finger millet varieties with strong drought  
309 tolerance traits as an effective way to achieve high and stable yields. For this to be  
310 successful, precise identification of stress tolerance of finger millet varieties forms the  
311 basis of developing resistant finger millet varieties. Therefore, dissecting the natural  
312 differences of finger millet varieties could be viable to explore the complex  
313 mechanisms of its response to various stresses. This study was done to investigate the  
314 differential responses of finger millet to seed germination, growth, physiological and  
315 biochemical responses after exposure to different concentrations of mannitol, which  
316 causes osmotic stress and is commonly used as a drought simulator (Ullah et al.,  
317 2014; Kaya et al., 2013; Karakas et al., 1997).

318

319 In plants life cycle, seed germination is the most critical and sensitive stage. The  
320 process of seed gemination is constrained or even completely prevented by drought  
321 stress (Hubbard et al. 2012). Germination potential is therefore an ideal index which  
322 is used to assess the seed germination rate and germination uniformity. The  
323 germination rate under simulated drought stress showed the tolerance, though the  
324 responses were variety dependent. In absence of stress treatment, the six finger millet  
325 varieties recorded better germination percentages. However, the rate declined with  
326 increase in mannitol concentration treatment. Similar results have been reported in  
327 other plant species such as maize (Liu et al. (2015), wheat (Yang et al., 2016) and  
328 sunflower (Ahmad et al., 2009). Seed germination process is divided into three  
329 successive stages: inhibition, metabolism that leads initiation of radicle growth, and  
330 radicle growth which primes radicle emergence. A threshold level of hydration is  
331 essential for the ensuing radicle elongation (Ramagopal, 1990). In normal seed  
332 germination process, a threshold of the embryo hydration level needs to be attained,  
333 which is a critical precondition for the successive initiation of cell elongation and  
334 radicle development (Hegarty, 1978). In our study, the presence of mannitol could  
335 have severely reduced internal osmotic potential of the germinating seeds, therefore  
336 permitting the water uptake which subsequently leads to germination initiation  
337 processes.

338

339 Plants capability to retain high water status during desiccation stress is a vital strategy  
340 for plant tolerance to drought stress. Accordingly, evaluation of relative water content  
341 change is the best representation and a fast approach to evaluating genetic differences  
342 in cellular hydration, plant water deficit and physiological water status after water  
343 deficit stress treatments (Sánchez-Rodríguez et al. 2010). Normally, high relative  
344 water content values are treated as index of drought stress tolerance, as demonstrated  
345 by Pandey et al. (2015) on rice genotypes tolerant or sensitive to drought. The  
346 differences in relative water content in all varieties observed in our study could be  
347 correlated with their different ability of water absorption from soil. The decline in  
348 relative water content recorded was a main factor that caused decreased growth  
349 responding to osmotic stress in the finger millet plants. Under desiccation stress,  
350 sensitive finger millet varieties were more affected by the decrease in relative water  
351 content than tolerant varieties. This suggested that the six finger millet varieties had  
352 different sensitivity when subjected mannitol induced drought. The enhanced water  
353 retention capacity observed in some of finger millet even when challenged by drought  
354 could play a vital role in for plant survival under drought conditions water deficit.

355

356 Plants chlorophyll content heavily depends on the species physiological responses and  
357 their ability to resist environmental stresses (Anjum et al., 2011). Evaluation of leaf  
358 chlorophyll concentration is one of the most effective diagnostic tool for studies of  
359 drought tolerance identification, genotypic variation, altitudinal variation and has  
360 been employed in many crops including cereals such as sorghum (Qadir et al., 2015)  
361 and foxtail millet (Wang et al., 2016). Plants can overcome this assault by increasing  
362 the accumulation of chlorophyll which protects the plants by getting rid of excessive  
363 energy by thermal dissipation (Reddy et al., 2004). Consequently, decline of  
364 chlorophyll concentration in response to drought stress is a common phenomenon,  
365 occasioned by disordering chlorophyll synthesis and resulting to plant chlorosis.  
366 Additionally, when plants are subjected to environmental stresses, leaf chloroplasts  
367 are injured which leads to disrupted photosynthesis. At higher mannitol  
368 concentrations above 200 mM, chlorosis was observed in all the varieties, and the  
369 leaves turned into pale yellow which lead to plant death.

370

371 Proline plays significant role in the osmoregulation, allowing cells to retain more  
372 water. Moreover, the amino acid also displays plant defense properties as a ROS  
373 scavenger (Szabados and Savouré, 2010) and as a regulator of the cellular redox status  
374 (Sharma et al., 2011). Proline accumulation has therefore a positive connection with  
375 their tolerance to various environmental stresses (Szabados and Savouré, 2010). In  
376 our study, the mannitol stressed plants showed significantly higher proline  
377 concentration was than control plants, especially in GBK042094. Our results revealed  
378 that free proline accumulation in the leaf tissues of drought susceptible finger millet  
379 varieties was significantly lower than the tolerant ones. These findings are  
380 corroborated by the data reported in previous research work which indicate that total  
381 free proline in the leaves are higher in water deficit tolerant than in drought  
382 susceptible lines of maize (Efeoğlu et al., 2009), sweetpotato (Mbinda et al., 2018),  
383 and rice (Pandey et al., 2015). The responses across the plant lines were  
384 concomitantly increased with progressive increment of mannitol dosage. Our results  
385 suggest that higher proline content in drought tolerant finger millet lines could be due  
386 to altered expression of drought responsive genes which potentially improve the  
387 hydration status of the plants. Our results also reinforce a close association between  
388 increased proline concentration and plant relative water content in drought tolerance  
389 mechanisms.

390

391 It is vital for antioxidative systems of plants to scavenge excess ROS in order to  
392 maintain a balanced equilibrium of cellular reactions when they challenged stress  
393 conditions (van Breusegem et al., 2018). The toxicity of ROS is due to their reactions  
394 with numerous cell components, which cause lipid peroxidation among other cascades  
395 of oxidative reactions (Wang et al., 2012). Cellular lipid peroxidation damages the  
396 plasma membrane, leading to leakage of contents, swift desiccation and cellular death  
397 (Demidchik, 2015). The final product of lipid peroxidation, is malondialdehyde and  
398 this solute is one of the best physiological biomarkers of drought tolerance in plants  
399 (Anjum et al., 2011). In this work, we found varieties and GBK043137 and  
400 GBK043094 having the least amounts of MDA when challenged by drought stress  
401 (Table 7). Low MDA levels has been correlated with desiccation stress tolerance and  
402 the ensuing lipid peroxidation could induce the activity of antioxidant enzymes

403 (Wang et al., 2012). Accumulation of MDA when challenged by environmental  
404 stresses has also been found to be a good drought tolerance index in other plant  
405 species pitanga (Toscano et al., 2016), melon (Sarabi, et al., 2017), desi chickpea  
406 (Farooq et al., 2018) and wheat (Mickky and Aldesuquy, 2016). From all the  
407 physiological responses examined, it evident that of finger millet responses to drought  
408 stress largely depends on the genotype/cultivars used the length and severity of water  
409 deficit stress and the stage of development of the plant.

410

### 411 **Conclusion**

412 In conclusion, our study provided a broad analysis of the physiological features of  
413 several finger millet plants to drought stress. The results reported here demonstrate  
414 the impact of drought stress on the analysed parameters with a wide range of  
415 variability among the studied varieties. Finger millet varieties GBK042094 and  
416 GBK043137 could tolerate water deficit better than four the other varieties, as  
417 indicated by significant decreases in germination rate, shoot length, root growth,  
418 relative water content, leaf total chlorophyll content, proline accumulation and lipid  
419 peroxidation. We deduced that these varieties are promising resources with  
420 considerable level of tolerance to drought stress and they can be used for further  
421 evaluations and breeding programs. Further investigations on genomic and molecular  
422 to deeply insight the detail mechanisms of drought tolerance in finger millet need to  
423 explored.

424

### 425 **Contributions**

426 AM and AN carried all the experiments. AM helped with draft the manuscript. CM,  
427 RO, MM and WM supervised the study, contributed in statistical analysis and writing  
428 the manuscript, WM conceived the idea, obtained of funding, contributed with  
429 experimental design, coordination and manuscript writing. All authors agreed on the  
430 final appearance of the manuscript after careful review.

431

### 432 **Acknowledgement**

433 This work was supported financially by a grant from The World Academy of Sciences  
434 (Ref. No. 17-357 RG/BIO/AF/AC\_I – FR3240297745) through the generous

435 contribution of the Swedish International Development Cooperation Agency. The  
436 authors gratefully acknowledge Kenya Agricultural and Livestock Research  
437 Organization, Gene Bank, for providing the finger millet seeds used. The authors also  
438 thank the Department of Biochemistry and Biotechnology, Kenyatta University for  
439 providing facilities for the research.

440

#### 441 **Conflict of interests**

442 The authors declare that the study was conducted without of any commercial or  
443 financial relationships that could be interpreted as a potential conflict of interest.

444

#### 445 **References**

446 Ahmad, S., Ahmad, R., Ashraf, M. Y., Ashraf, M., & Waraich, E. A. (2009).  
447 Sunflower (*Helianthus annuus* L.) response to drought stress at germination and  
448 seedling growth stages. *Pak. J. Bot*, 41(2), 647-654.

449

450 Anjum, S. A., Xie, X. Y., Wang, L. C., Saleem, M. F., Man, C., & Lei, W. (2011).  
451 Morphological, physiological and biochemical responses of plants to drought stress.  
452 *African Journal of Agricultural Research*, 6(9), 2026-2032.

453

454 Arnon, D. I. (1949). Copper enzymes in isolated chloroplasts. Polyphenoloxidase in  
455 *Beta vulgaris*. *Plant physiology*, 24(1), 1.

456

457 Arnon, D. I. (1949). Copper enzymes in isolated chloroplasts. Polyphenoloxidase in  
458 *Beta vulgaris*. *Plant physiology*, 24(1), 1.

459

460 Ashraf, M. F. M. R., & Foolad, M. (2007). Roles of glycine betaine and proline in  
461 improving plant abiotic stress resistance. *Environmental and experimental botany*,  
462 59(2), 206-216.

463

464 Bates, L. S., Waldren, R. P., & Teare, I. D. (1973). Rapid determination of free  
465 proline for water-stress studies. *Plant and soil*, 39(1), 205-207.

466

467 Budak, H., Kantar, M., & Kurtoglu, K. (2013). Drought tolerance in modern and wild  
468 wheat. *The Scientific World Journal*, 2013.

469

470 Caliz, J., Montes-Borrego, M., Triadó-Margarit, X., Metsis, M., Landa, B. B., &  
471 Casamayor, E. O. (2015). Influence of edaphic, climatic, and agronomic factors on the  
472 composition and abundance of nitrifying microorganisms in the rhizosphere of  
473 commercial olive crops. *PloS one*, 10(5), e0125787.

474

- 475 Chaves, M. M., & Oliveira, M. M. (2004). Mechanisms underlying plant resilience to  
476 water deficits: prospects for water-saving agriculture. *Journal of experimental botany*,  
477 55(407), 2365-2384.  
478
- 479 Demidchik, V. (2015). Mechanisms of oxidative stress in plants: from classical  
480 chemistry to cell biology. *Environmental and experimental botany*, 109, 212-228.  
481
- 482 Demirevska, K., Zasheva, D., Dimitrov, R., Simova-Stoilova, L., Stamenova, M., &  
483 Feller, U. (2009). Drought stress effects on Rubisco in wheat: changes in the Rubisco  
484 large subunit. *Acta Physiologiae Plantarum*, 31(6), 1129.  
485
- 486 Efeoğlu, B., Ekmekci, Y., & Cicek, N. (2009). Physiological responses of three maize  
487 cultivars to drought stress and recovery. *South African Journal of Botany*, 75(1), 34-  
488 42.  
489
- 490 Efeoğlu, B., Ekmekci, Y., & Cicek, N. (2009). Physiological responses of three maize  
491 cultivars to drought stress and recovery. *South African Journal of Botany*, 75(1), 34-  
492 42.  
493
- 494 Ekanayake, I. J., O'toole, J. C., Garrity, D. P., & Masajo, T. M. (1985). Inheritance of  
495 root characters and their relations to drought resistance in rice 1. *Crop Science*, 25(6),  
496 927-933.  
497
- 498 Ellouzi, H., Hamed, K. B., Cela, J., Munné-Bosch, S., & Abdelly, C. (2011). Early  
499 effects of salt stress on the physiological and oxidative status of *Cakile maritima*  
500 (halophyte) and *Arabidopsis thaliana* (glycophyte). *Physiologia Plantarum*, 142(2),  
501 128-143.  
502
- 503 Farooq, M., Ullah, A., Lee, D. J., Alghamdi, S. S., & Siddique, K. H. (2018). Desi  
504 chickpea genotypes tolerate drought stress better than kabuli types by modulating  
505 germination metabolism, trehalose accumulation, and carbon assimilation. *Plant*  
506 *Physiology and Biochemistry*, 126, 47-54.  
507
- 508 Forni, C., Duca, D., & Glick, B. R. (2017). Mechanisms of plant response to salt and  
509 drought stress and their alteration by rhizobacteria. *Plant and Soil*, 410(1-2), 335-356.  
510
- 511 Heath, R. L., & Packer, L. (1968). Photoperoxidation in isolated chloroplasts: I.  
512 Kinetics and stoichiometry of fatty acid peroxidation. *Archives of biochemistry and*  
513 *biophysics*, 125(1), 189-198.  
514
- 515 Hegarty, T. W. (1978). The physiology of seed hydration and dehydration, and the  
516 relation between water stress and the control of germination: a review. *Plant, Cell &*  
517 *Environment*, 1(2), 101-119.  
518
- 519 Hubbard, M., Germida, J., & Vujanovic, V. (2012). Fungal endophytes improve  
520 wheat seed germination under heat and drought stress. *Botany*, 90(2), 137-149.  
521



- 522 Karakas, B., Ozias-Akins, P., Stushnoff, C., Suefferheld, M., & Rieger, M. (1997).  
523 Salinity and drought tolerance of mannitol-accumulating transgenic tobacco. *Plant,*  
524 *Cell & Environment*, 20(5), 609-616.  
525
- 526 Kaya, C., Sonmez, O., Aydemir, S., Ashraf, M., & Dikilitas, M. (2013). Exogenous  
527 application of mannitol and thiourea regulates plant growth and oxidative stress  
528 responses in salt-stressed maize (*Zea mays* L.). *Journal of plant interactions*, 8(3),  
529 234-241.  
530
- 531 Kotchoni, S. O., Kuhns, C., Ditzer, A., Kirch, H. H., & Bartels, D. (2006).  
532 Over-expression of different aldehyde dehydrogenase genes in *Arabidopsis thaliana*  
533 confers tolerance to abiotic stress and protects plants against lipid peroxidation and  
534 oxidative stress. *Plant, cell & environment*, 29(6), 1033-1048.  
535
- 536 Kumar, A., Metwal, M., Kaur, S., Gupta, A.K., Puranik, S., Singh, S., Singh, M.,  
537 Gupta, S., Babu, B.K., Sood, S. & Yadav, R. (2016). Nutraceutical value of finger  
538 millet [*Eleusine coracana* (L.) Gaertn.], and their improvement using omics  
539 approaches. *Frontiers in plant science*, 7, p.934.  
540
- 541 Li, X., & Liu, F. (2016). Drought stress memory and drought stress tolerance in  
542 plants: biochemical and molecular basis. In *Drought Stress Tolerance in Plants*, Vol 1  
543 (pp. 17-44). Springer, Cham.  
544
- 545 Liu, M., Li, M., Liu, K., & Sui, N. (2015). Effects of drought stress on seed  
546 germination and seedling growth of different maize varieties. *Journal of Agricultural*  
547 *Science*, 7(5), 231.  
548
- 549 Mbinda, W., Ombori, O., Dixelius, C., & Oduor, R. (2018). Xerophyta viscosa Aldose  
550 Reductase, XvAld1, Enhances Drought Tolerance in Transgenic Sweetpotato.  
551 *Molecular biotechnology*, 60(3), 203-214.  
552
- 553 Mickky, B. M., & Aldesuquy, H. S. (2017). Impact of osmotic stress on seedling  
554 growth observations, membrane characteristics and antioxidant defense system of  
555 different wheat genotypes. *Egyptian Journal of Basic and Applied Sciences*, 4(1), 47-  
556 54.  
557
- 558 Møller, I. M., Jensen, P. E., & Hansson, A. (2007). Oxidative modifications to cellular  
559 components in plants. *Annu. Rev. Plant Biol.*, 58, 459-481.  
560
- 561 Pandey, V., & Shukla, A. (2015). Acclimation and tolerance strategies of rice under  
562 drought stress. *Rice Science*, 22(4), 147-161.  
563
- 564 Pandey, V., Ansari, M. W., Tula, S., Yadav, S., Sahoo, R. K., Shukla, N., ... &  
565 Kumar, A. (2016). Dose-dependent response of *Trichoderma harzianum* in improving  
566 drought tolerance in rice genotypes. *Planta*, 243(5), 1251-1264.  
567

- 568 Passioura, J. B. (1983). Roots and drought resistance. In *Developments in*  
569 *Agricultural and Managed Forest Ecology* (Vol. 12, pp. 265-280). Elsevier.  
570
- 571 Qadir, M., Quill rou, E., Nangia, V., Murtaza, G., Singh, M., Thomas, R.J., Drechsel,  
572 P. and Noble, A.D. (2014). November. Economics of salt-induced land degradation  
573 and restoration. In *Natural Resources Forum* (Vol. 38, No. 4, pp. 282-295).  
574
- 575 Radhouane, L. (2007). Response of Tunisian autochthonous pearl millet (*Pennisetum*  
576 *glaucum* (L.) R. Br.) to drought stress induced by polyethylene glycol (PEG) 6000.  
577 *African journal of biotechnology*, 6(9),1102-1105.  
578
- 579 Ramagopal, S. (1990). Inhibition of seed germination by salt and its subsequent effect  
580 on embryonic protein synthesis in barley. *Journal of Plant Physiology*, 136(5), 621-  
581 625.  
582
- 583 Reddy, A. R., Chaitanya, K. V., & Vivekanandan, M. (2004). Drought-induced  
584 responses of photosynthesis and antioxidant metabolism in higher plants. *Journal of*  
585 *plant physiology*, 161(11), 1189-1202.  
586
- 587 Rishmawi, K., Prince, S., & Xue, Y. (2016). Vegetation responses to climate  
588 variability in the northern arid to sub-humid zones of Sub-Saharan Africa. *Remote*  
589 *Sensing*, 8(11), 910.
- 590 S nchez-Rodr guez, E., Rubio-Wilhelmi, M., Cervilla, L. M., Blasco, B., Rios, J. J.,  
591 Rosales, M. A., & Ruiz, J. M. (2010). Genotypic differences in some physiological  
592 parameters symptomatic for oxidative stress under moderate drought in tomato plants.  
593 *Plant science*, 178(1), 30-40.  
594
- 595 Sarabi, B., Bolandnazar, S., Ghaderi, N., & Ghashghaie, J. (2017). Genotypic  
596 differences in physiological and biochemical responses to salinity stress in melon  
597 (*Cucumis melo* L.) plants: Prospects for selection of salt tolerant landraces. *Plant*  
598 *Physiology and Biochemistry*, 119, 294-311.  
599
- 600 Sharma, S., Villamor, J. G. C., & Verslues, P. E. (2011). Essential role of tissue  
601 specific proline synthesis and catabolism in growth and redox balance at low water  
602 potential. *Plant physiology*, pp-111.  
603
- 604 Szabados, L., & Savoure, A. (2010). Proline: a multifunctional amino acid. *Trends in*  
605 *plant science*, 15(2), 89-97.  
606
- 607 Thilakarathna, M. S., & Raizada, M. N. (2015). A review of nutrient management  
608 studies involving finger millet in the semi-arid tropics of Asia and Africa. *Agronomy*,  
609 5(3), 262-290.  
610
- 611 Todaka, D., Shinozaki, K., & Yamaguchi-Shinozaki, K. (2015). Recent advances in  
612 the dissection of drought-stress regulatory networks and strategies for development of  
613 drought-tolerant transgenic rice plants. *Frontiers in plant science*, 6, 84.  
614

- 615 Toscano, S., Farieri, E., Ferrante, A., & Romano, D. (2016). Physiological and  
616 biochemical responses in two ornamental shrubs to drought stress. *Frontiers in plant*  
617 *science*, 7, 645.  
618
- 619 Ullah, I., Akhtar, N., Mehmood, N., Shah, I. A., & Noor, M. (2014). Effect of  
620 mannitol induced drought stress on seedling traits and protein profile of two wheat  
621 cultivars. *J. Animal Plant Sci*, 24, 1246-1251.  
622
- 623 Van Breusegem, F., Foyer, C., & Mann, G. (2018). Reactive oxygen species are  
624 crucial “pro-life” survival signals in plants. *Free Radical Biology and Medicine* 122:  
625 1–3.  
626
- 627 Wang, Y., Li, L., Tang, S., Liu, J., Zhang, H., Zhi, H., Jia, G & Diao, X. (2016).  
628 Combined small RNA and degradome sequencing to identify miRNAs and their  
629 targets in response to drought in foxtail millet. *BMC genetics*, 17(1), 57.  
630
- 631 Yang, H., Feng, J., Zhai, S., Dai, Y., Xu, M., Wu, J., Shen, M., Bian, X., Koide, R.T.  
632 & Liu, J. (2016). Long-term ditch-buried straw return alters soil water potential,  
633 temperature, and microbial communities in a rice-wheat rotation system. *Soil and*  
634 *Tillage Research*, 163, 21-31.  
635
- 636 Zougmore, R. (2018). Promoting climate-smart agriculture through water and nutrient  
637 interactions options in semi-arid West Africa: A review of evidence and empirical  
638 analysis. In improving the profitability, sustainability and efficiency of nutrients  
639 through site specific fertilizer recommendations in West Africa agro-ecosystems (pp.  
640 249-263). Springer, Cham.  
641  
642  
643  
644  
645  
646  
647  
648  
649  
650  
651

652 **Figures**

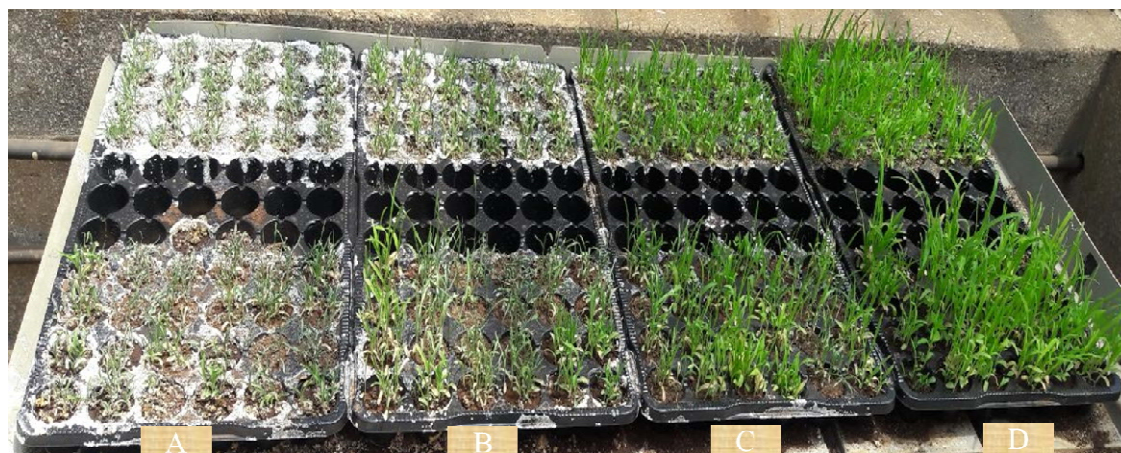

653

654

655

656

**Fig 1.** Effect of drought stress on growth of finger millet. Seedling growth on (A) 600 mM mannitol. (B) 400 mM mannitol; (C) 200 mM mannitol; (D) 0 mM mannitol.

657 **Tables**

658 **Table1. Effects of mannitol on germination of six finger millet varieties**

| Variety   | 0 mM                     | 200 mM                  | 400 mM                  | 600 mM                 |
|-----------|--------------------------|-------------------------|-------------------------|------------------------|
| GBK043137 | 83.75±4.7 <sup>a</sup>   | 41.25±8.75 <sup>a</sup> | 0.00±0.00 <sup>b</sup>  | 0.00±0.00 <sup>a</sup> |
| GBK043128 | 65.0±14.00 <sup>ab</sup> | 3.75±2.39 <sup>b</sup>  | 1.25±1.25 <sup>b</sup>  | 0.00±0.00 <sup>a</sup> |
| GBK043124 | 72.50±4.33 <sup>ab</sup> | 16.25±3.75 <sup>b</sup> | 16.25±8.26 <sup>a</sup> | 0.00±0.00 <sup>a</sup> |
| GBK043122 | 65.00±7.36 <sup>ab</sup> | 3.75±2.39 <sup>b</sup>  | 0.00±0.00 <sup>b</sup>  | 0.00±0.00 <sup>a</sup> |
| GBK043094 | 51.25±5.91 <sup>b</sup>  | 8.75±7.18 <sup>b</sup>  | 0.00±0.00 <sup>b</sup>  | 0.00±0.00 <sup>a</sup> |
| GBK043050 | 66.25±9.66 <sup>ab</sup> | 6.25±3.15 <sup>b</sup>  | 0.00±0.00 <sup>b</sup>  | 0.00±0.00 <sup>a</sup> |

659 Means (±SE) followed by different alphabets in each column are significantly  
 660 different (P≤0.05) using Fishers LSD

661 **Table 2. Effect of mannitol on shoot length**

| Variety   | 0 mM                   | 200 mM                  | 400 mM                 | 600 mM                 |
|-----------|------------------------|-------------------------|------------------------|------------------------|
| GBK043137 | 7.80±0.86 <sup>a</sup> | 2.30±0.20 <sup>b</sup>  | 1.80±0.27 <sup>a</sup> | 1.20±0.20 <sup>a</sup> |
| GBK043128 | 7.60±1.33 <sup>a</sup> | 3.00±0.27 <sup>a</sup>  | 2.20±0.26 <sup>a</sup> | 1.30±0.20 <sup>a</sup> |
| GBK043124 | 4.40±0.40 <sup>b</sup> | 2.20±0.20 <sup>b</sup>  | 2.00±0.27 <sup>a</sup> | 1.30±0.20 <sup>a</sup> |
| GBK043122 | 4.00±0.45 <sup>b</sup> | 2.40±0.29 <sup>ab</sup> | 1.70±0.20 <sup>a</sup> | 1.30±0.20 <sup>a</sup> |
| GBK043094 | 3.00±0.00 <sup>b</sup> | 2.40±0.19 <sup>ab</sup> | 1.60±0.19 <sup>a</sup> | 1.20±0.20 <sup>a</sup> |
| GBK043050 | 3.70±0.62 <sup>b</sup> | 2.10±0.10 <sup>b</sup>  | 1.60±0.19 <sup>a</sup> | 1.30±0.20 <sup>a</sup> |

663 Means (±SE) followed by different alphabets in each column are significantly  
 664 different (P≤0.05) using Fishers LSD.

665 **Table 3. Effect of mannitol on root growth**

| Variety   | 0 mM                   | 200 mM                  | 400 mM                 | 600 mM                  |
|-----------|------------------------|-------------------------|------------------------|-------------------------|
| GBK043137 | 3.10±0.75 <sup>a</sup> | 2.60±0.73 <sup>b</sup>  | 2.70±0.62 <sup>a</sup> | 3.20±0.68 <sup>c</sup>  |
| GBK043128 | 3.20±0.37 <sup>a</sup> | 4.30±0.49 <sup>a</sup>  | 4.60±0.93 <sup>a</sup> | 5.00±0.45 <sup>ab</sup> |
| GBK043124 | 2.60±0.40 <sup>a</sup> | 3.20±0.37 <sup>ab</sup> | 3.60±0.40 <sup>a</sup> | 3.60±0.68 <sup>bc</sup> |
| GBK043122 | 2.70±0.62 <sup>a</sup> | 3.40±0.25 <sup>ab</sup> | 3.60±0.68 <sup>a</sup> | 5.00±0.45 <sup>ab</sup> |
| GBK043094 | 2.0±0.57 <sup>a</sup>  | 3.50±0.78 <sup>ab</sup> | 3.60±0.68 <sup>a</sup> | 6.00±0.84 <sup>a</sup>  |
| GBK043050 | 2.00±0.61 <sup>a</sup> | 2.30±0.30 <sup>b</sup>  | 2.90±0.56 <sup>a</sup> | 3.90±0.25 <sup>bc</sup> |

667 Means (±SE) followed by different alphabets in each column are significantly  
 668 different (P ≤0.05) using Fishers LSD.

669 **Table 4. Effects of mannitol on relative water content (%)**

| Variety   | 0 mM                     | 200 mM                  | 400 mM                   | 600 mM                   |
|-----------|--------------------------|-------------------------|--------------------------|--------------------------|
| GBK043137 | 85.56±4.12 <sup>a</sup>  | 68.60±5.27 <sup>c</sup> | 64.96±4.62 <sup>ab</sup> | 49.76±3.78 <sup>ab</sup> |
| GBK043128 | 85.84±3.05 <sup>a</sup>  | 74.24±2.33 <sup>b</sup> | 65.24±2.68 <sup>ab</sup> | 54.76±4.23 <sup>a</sup>  |
| GBK043124 | 77.20±5.03 <sup>ab</sup> | 67.14±3.02 <sup>c</sup> | 60.78±4.88 <sup>bc</sup> | 49.38±4.85 <sup>b</sup>  |
| GBK043122 | 74.16±2.94 <sup>c</sup>  | 66.92±3.05 <sup>c</sup> | 57.98±4.06 <sup>c</sup>  | 40.18±1.96 <sup>c</sup>  |
| GBK042094 | 85.92±3.76 <sup>a</sup>  | 75.50±4.12 <sup>b</sup> | 68.84±2.71 <sup>a</sup>  | 46.82±3.55 <sup>b</sup>  |
| GBK043050 | 81.94±7.91 <sup>ab</sup> | 83.44±5.92 <sup>a</sup> | 66.14±6.32 <sup>ab</sup> | 48.74±5.28 <sup>b</sup>  |

671 Means (±SE) followed by different alphabets in each column are significantly  
 672 different (P≤0.05) using Fishers LSD.

673  
 674

675 **Table 5. Effects of mannitol on chlorophyll content (mg/g FW)**

| Variety   | 0 mM                    | 200 mM                   | 400 mM                  | 600 mM                    |
|-----------|-------------------------|--------------------------|-------------------------|---------------------------|
| GBK043137 | 15.35±1.12 <sup>b</sup> | 14.51±1.23 <sup>c</sup>  | 11.81±0.68 <sup>b</sup> | 10.27±0.61 <sup>abc</sup> |
| GBK043128 | 21.74±2.26 <sup>a</sup> | 18.65±1.90 <sup>a</sup>  | 14.23±1.49 <sup>a</sup> | 12.30±1.29 <sup>a</sup>   |
| GBK043124 | 17.33±1.47 <sup>b</sup> | 15.16±1.78 <sup>bc</sup> | 11.40±1.02 <sup>b</sup> | 9.99±1.00 <sup>bc</sup>   |
| GBK043122 | 16.56±1.12 <sup>b</sup> | 15.06±0.91 <sup>bc</sup> | 10.96±1.03 <sup>b</sup> | 9.76±1.58 <sup>c</sup>    |
| GBK042094 | 18.26±2.57 <sup>b</sup> | 17.33±2.35 <sup>ab</sup> | 14.32±2.15 <sup>a</sup> | 12.14±1.78 <sup>ab</sup>  |
| GBK043050 | 16.78±0.07 <sup>b</sup> | 14.86±0.06 <sup>bc</sup> | 10.55±0.06 <sup>b</sup> | 9.13±0.23 <sup>c</sup>    |

676 Means (±SE) followed by different alphabets in each column are significantly  
 677 different (P≤0.05) using Fishers LSD.

678

679 **Table 6. Effects of mannitol on proline content (µmol/g FW)**

| Variety   | 0 mM                   | 200 mM                   | 400 mM                 | 600 mM                  |
|-----------|------------------------|--------------------------|------------------------|-------------------------|
| GBK043137 | 1.76±0.09 <sup>a</sup> | 2.12±0.19 <sup>ab</sup>  | 3.22±0.26 <sup>a</sup> | 4.28±0.29 <sup>a</sup>  |
| GBK043128 | 1.76±0.27 <sup>a</sup> | 1.90±0.16 <sup>c</sup>   | 2.76±0.21 <sup>b</sup> | 3.76±0.18 <sup>c</sup>  |
| GBK043124 | 1.74±0.27 <sup>a</sup> | 1.98±0.19 <sup>abc</sup> | 2.84±0.17 <sup>b</sup> | 3.50±0.14 <sup>c</sup>  |
| GBK043122 | 1.86±0.34 <sup>a</sup> | 1.92±0.23 <sup>bc</sup>  | 2.86±0.21 <sup>b</sup> | 3.80±0.17 <sup>b</sup>  |
| GBK042094 | 1.70±0.21 <sup>a</sup> | 2.16±0.19 <sup>a</sup>   | 3.28±0.18 <sup>a</sup> | 4.52±0.22 <sup>a</sup>  |
| GBK043050 | 1.74±0.27 <sup>a</sup> | 1.98±0.15 <sup>abc</sup> | 2.82±0.19 <sup>b</sup> | 3.60±0.24 <sup>bc</sup> |

680 Means (±SE) followed by different alphabets in each column are significantly  
 681 different (P≤0.05) using Fishers LSD.

682

683 **Table 7. Effects of mannitol on malondialdehyde content (µmol/g FW)**

| Variety   | 0 mM                     | 200 mM                  | 400 mM                  | 600 mM                 |
|-----------|--------------------------|-------------------------|-------------------------|------------------------|
| GBK043137 | 2.03±0.55 <sup>c</sup>   | 2.77±0.39 <sup>c</sup>  | 4.29±0.62 <sup>d</sup>  | 5.26±0.34 <sup>c</sup> |
| GBK043128 | 2.27±0.46 <sup>abc</sup> | 3.43±0.49 <sup>b</sup>  | 5.75±0.36 <sup>a</sup>  | 7.23±0.36 <sup>a</sup> |
| GBK043124 | 2.58±0.33 <sup>abc</sup> | 3.91±0.37 <sup>ab</sup> | 5.00±0.45 <sup>bc</sup> | 6.17±0.47 <sup>b</sup> |
| GBK043122 | 2.66±0.38 <sup>ab</sup>  | 4.21±0.33 <sup>a</sup>  | 5.72±0.35 <sup>a</sup>  | 7.03±0.53 <sup>a</sup> |
| GBK042094 | 2.79±0.63 <sup>a</sup>   | 3.74±0.67 <sup>ab</sup> | 4.41±0.77 <sup>cd</sup> | 5.39±0.51 <sup>c</sup> |
| GBK043050 | 2.10±0.15 <sup>bc</sup>  | 3.63±0.27 <sup>b</sup>  | 5.67±0.60 <sup>ab</sup> | 7.62±0.97 <sup>a</sup> |

684 Means (±SE) followed by different alphabets in each column are significantly  
 685 different (P≤0.05) using Fishers LSD.

686
